# Supplementary material for: Regioselective Synthesis of 6-O-Acetyl Dieckol and Its Selective Cytotoxicity against Non-Small-Cell Lung Cancer Cells
Source: MDPI journal article supplement (doi:10.3390/md20110683), 2022-10-29
Supplement: s1 [file s1]

**Figure S1: Chemical structures of 2 – 5**

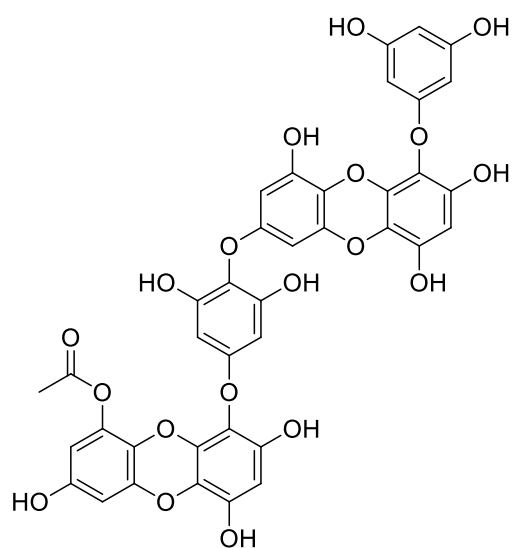

2

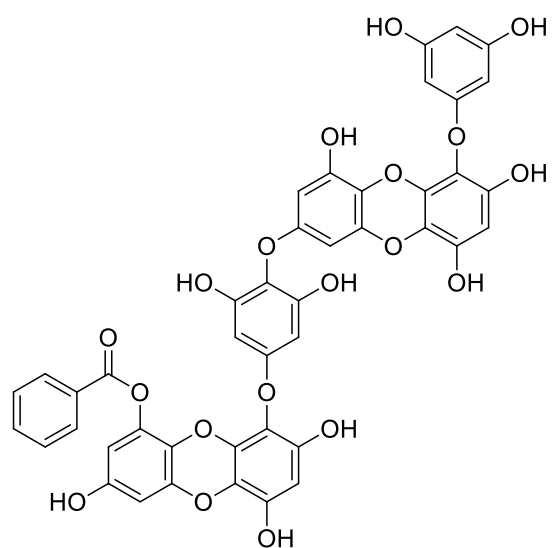

3

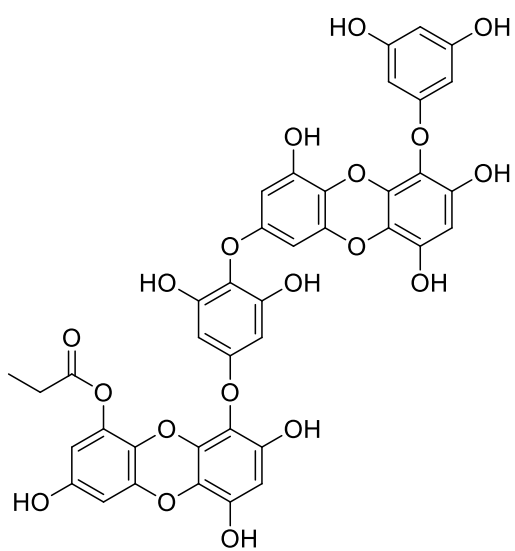

4

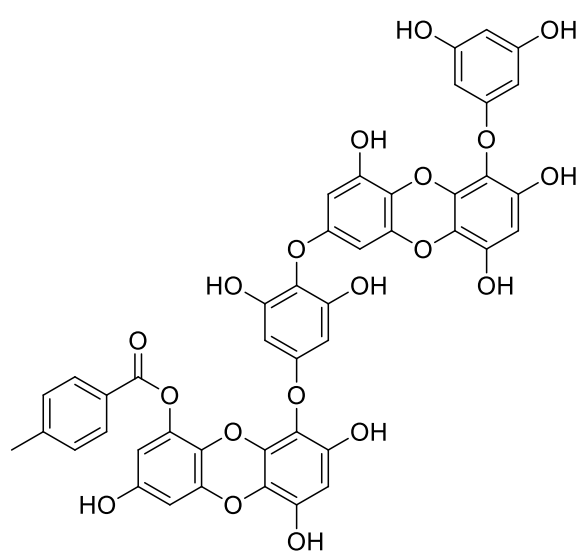

5

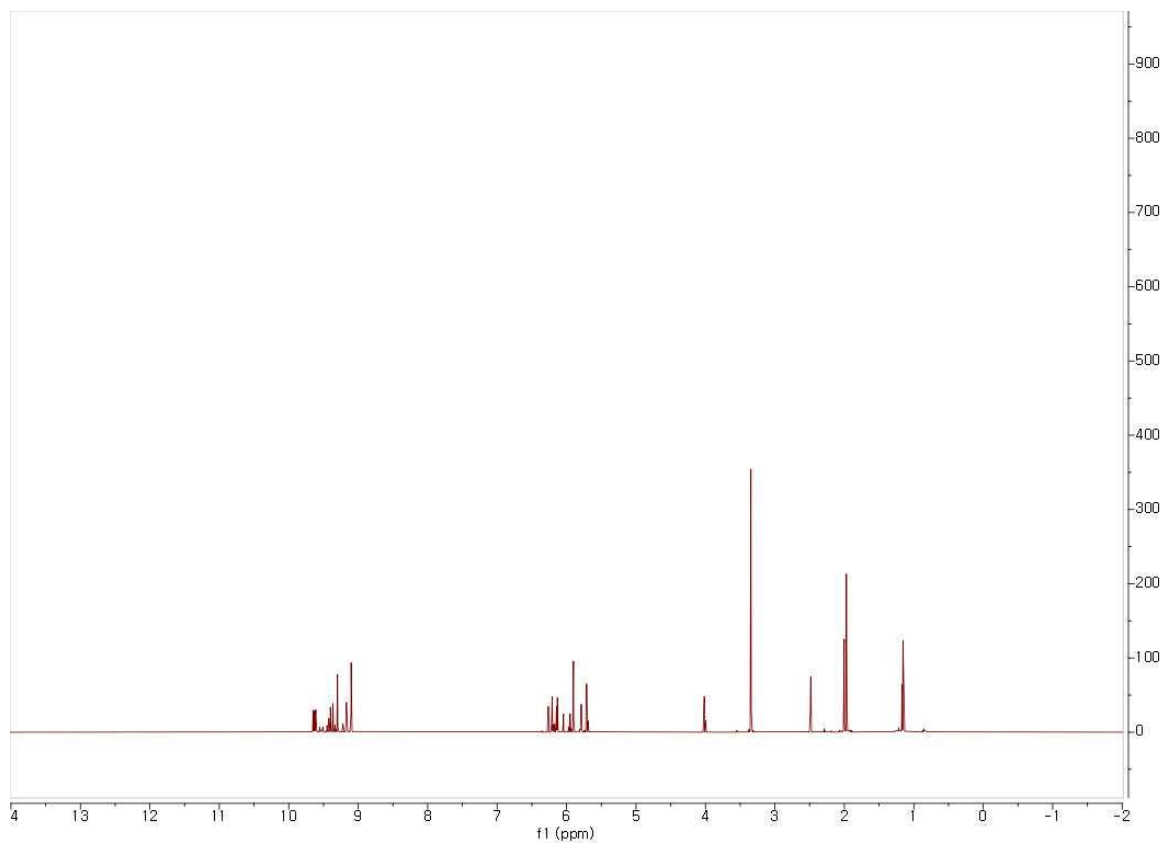

**Figure S2.**  $^1\text{H}$  NMR spectrum of **2** (600 MHz,  $\text{DMSO}-d_6$ )

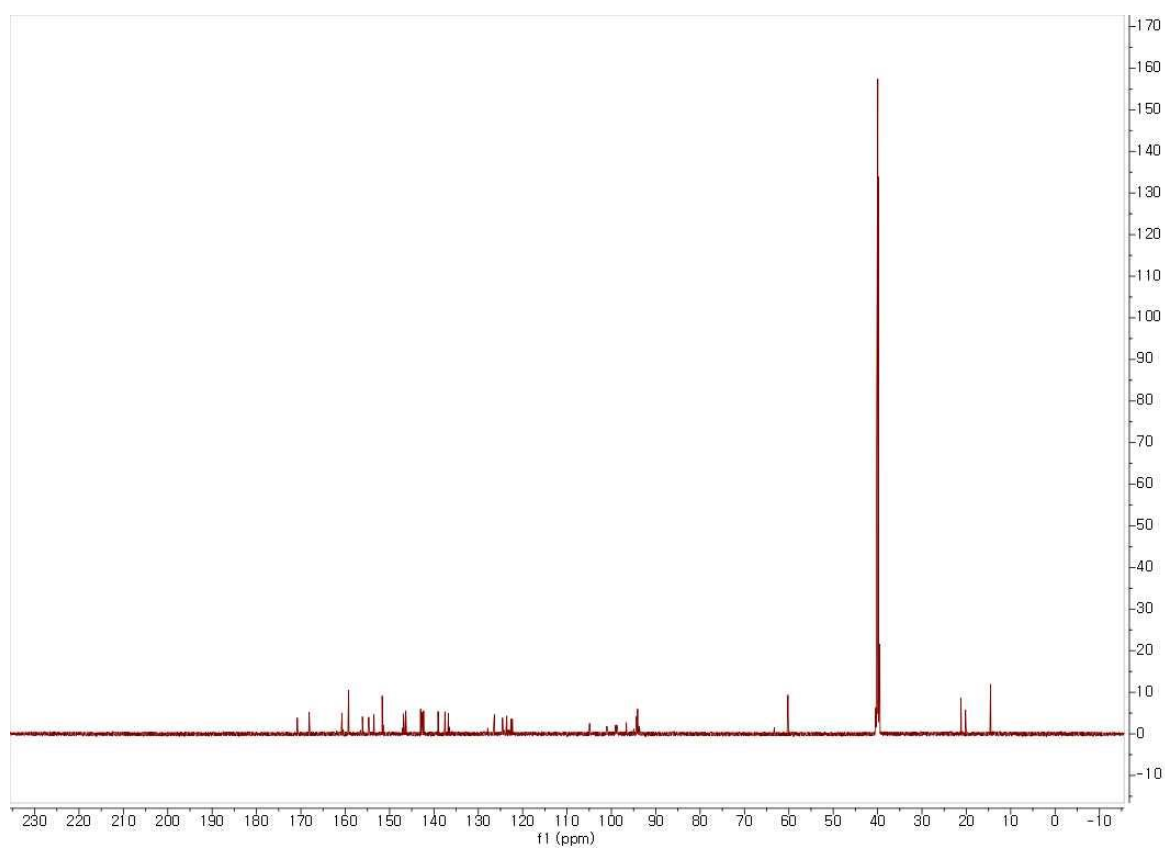

**Figure S3.**  $^{13}\text{C}$  NMR spectrum of **2** (150 MHz,  $\text{DMSO}-d_6$ )

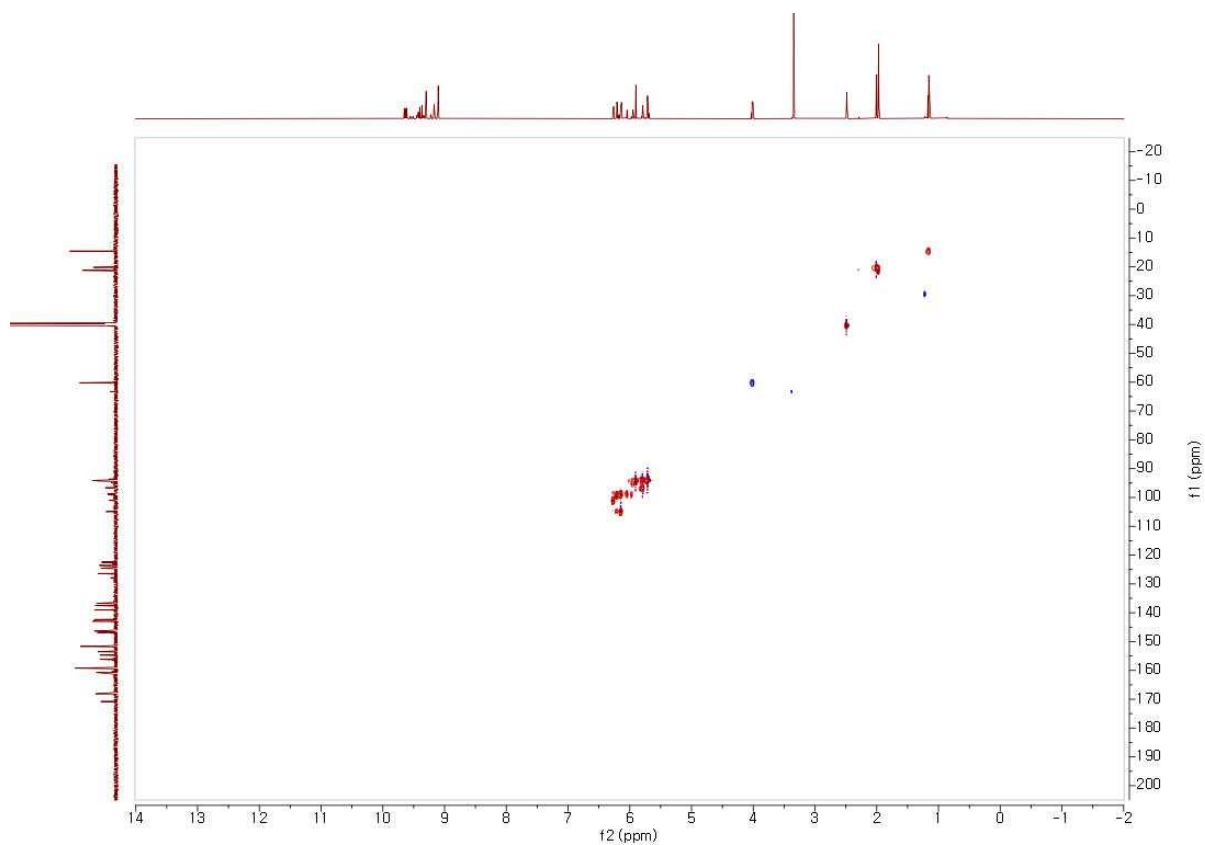

**Figure S4.** HSQC spectrum of **2** (600 MHz, DMSO- $d_6$ )

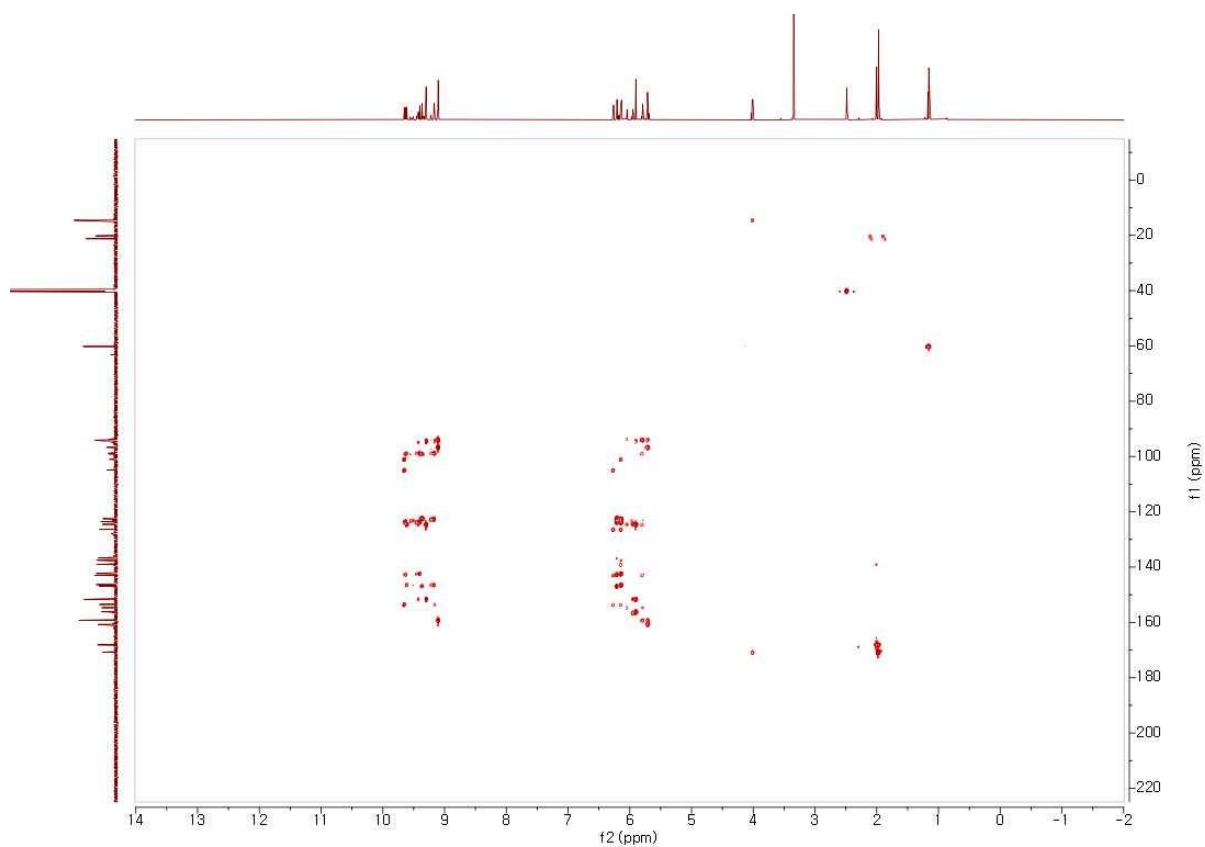

**Figure S5.** HMBC spectrum of **2** (600 MHz, DMSO- $d_6$ )

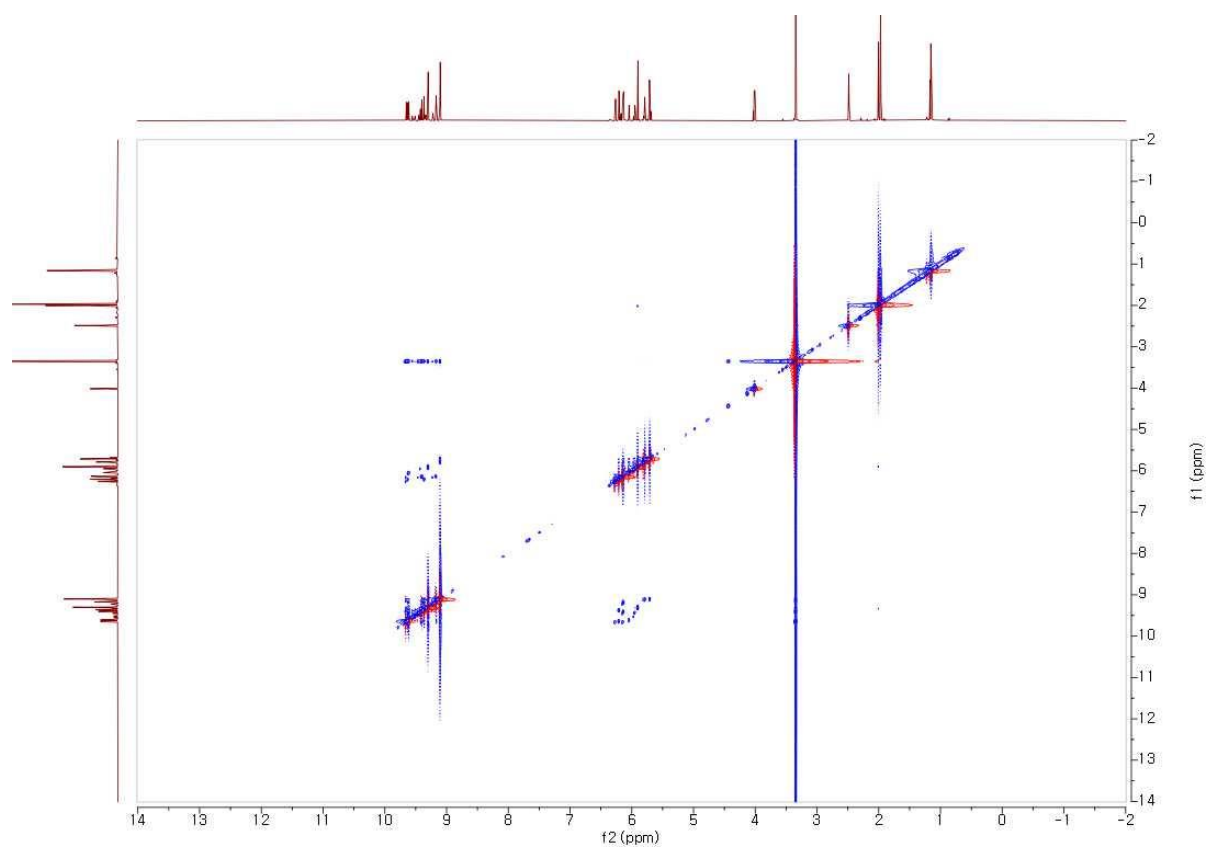

**Figure S6.** NOESY spectrum of **2** (600 MHz, DMSO- $d_6$ )

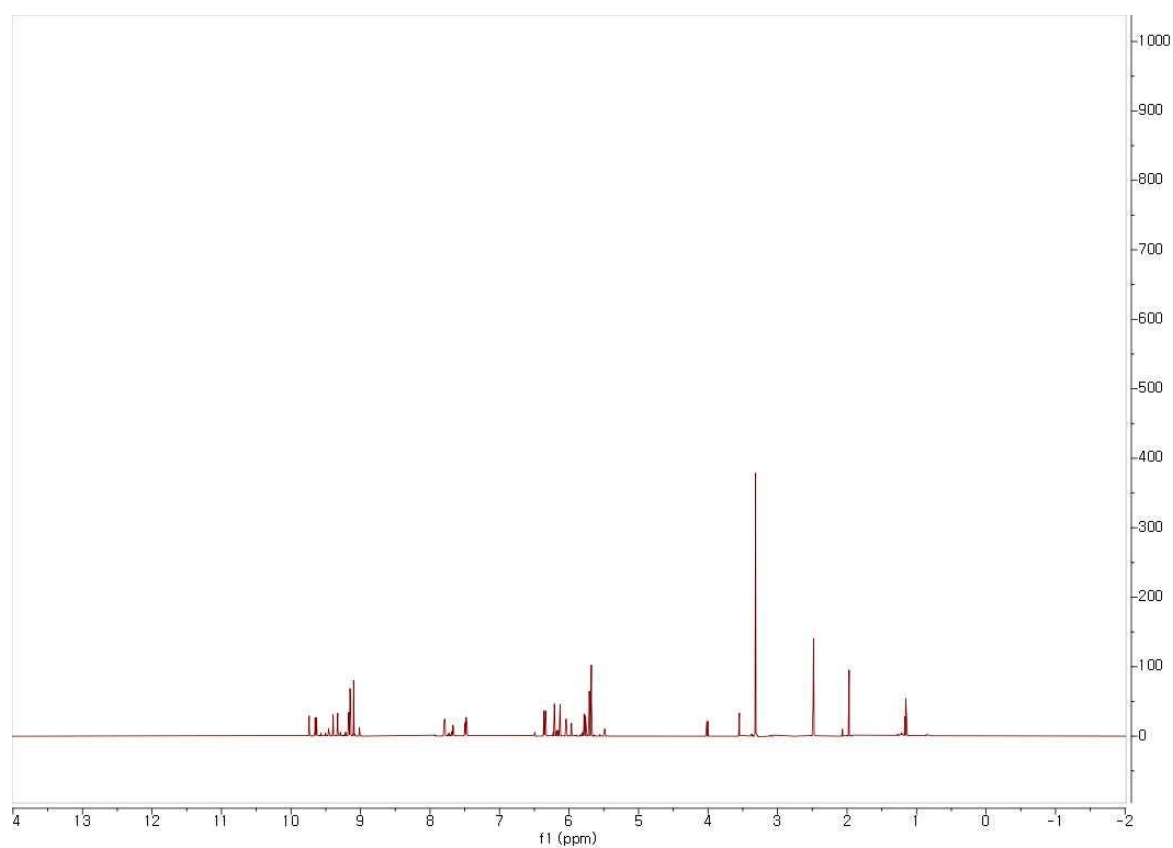

**Figure S7.**  $^1\text{H}$  NMR spectrum of **3** (600 MHz, DMSO- $d_6$ )

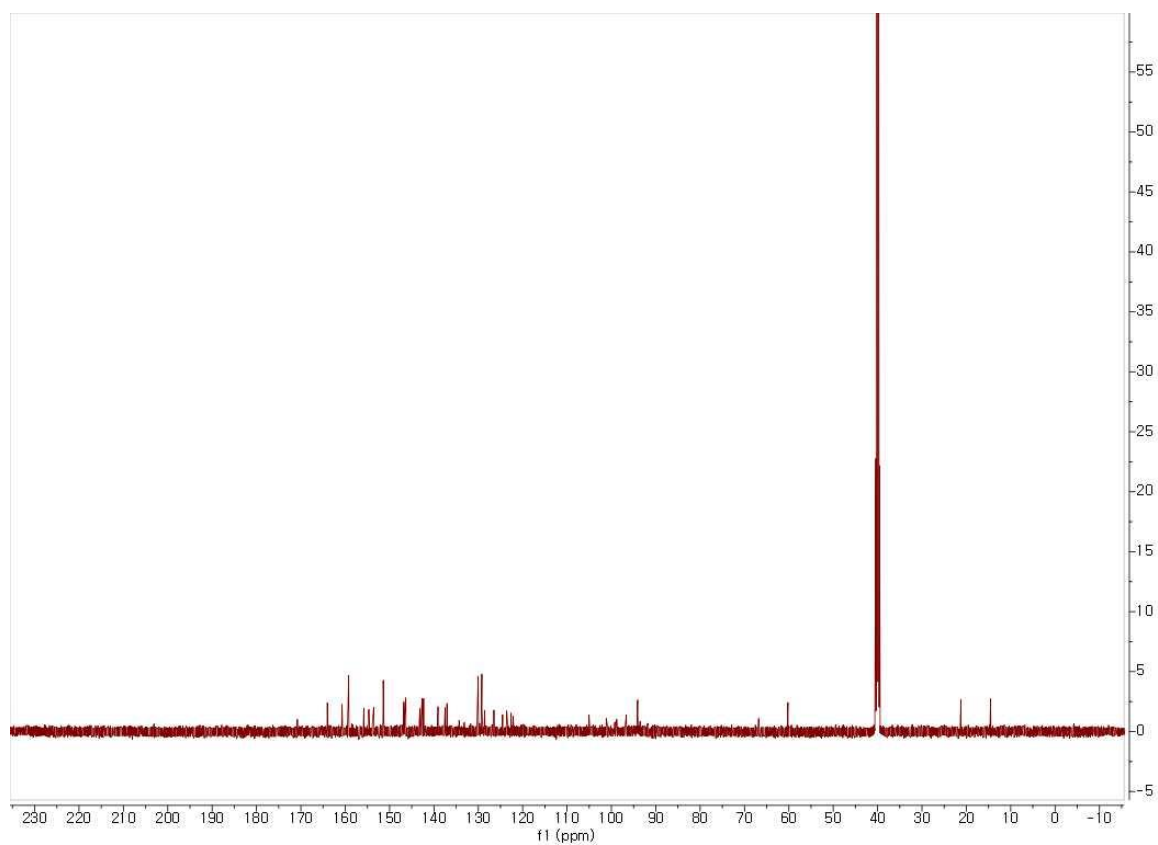

**Figure S8.**  $^{13}\text{C}$  NMR spectrum of **3** (150 MHz,  $\text{DMSO}-d_6$ )

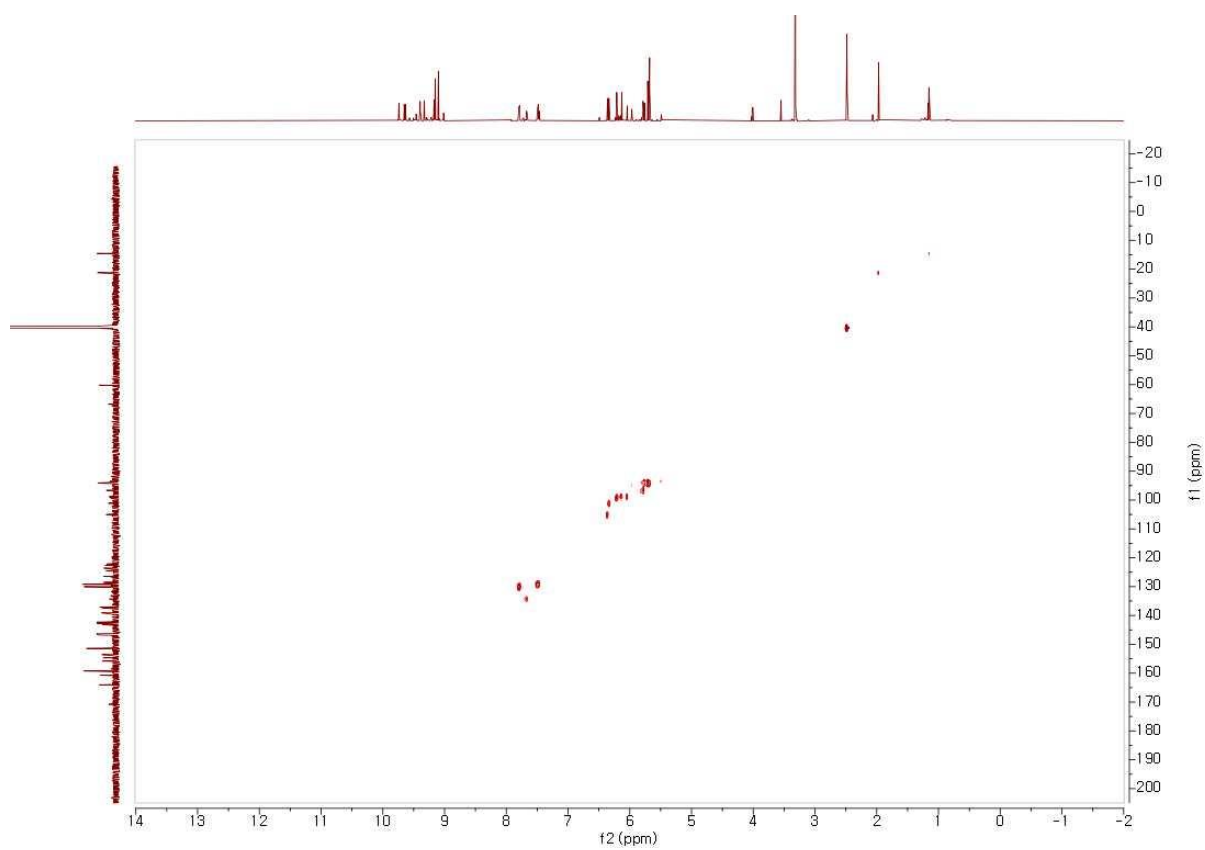

**Figure S9.** HSQC spectrum of **3** (600 MHz,  $\text{DMSO}-d_6$ )

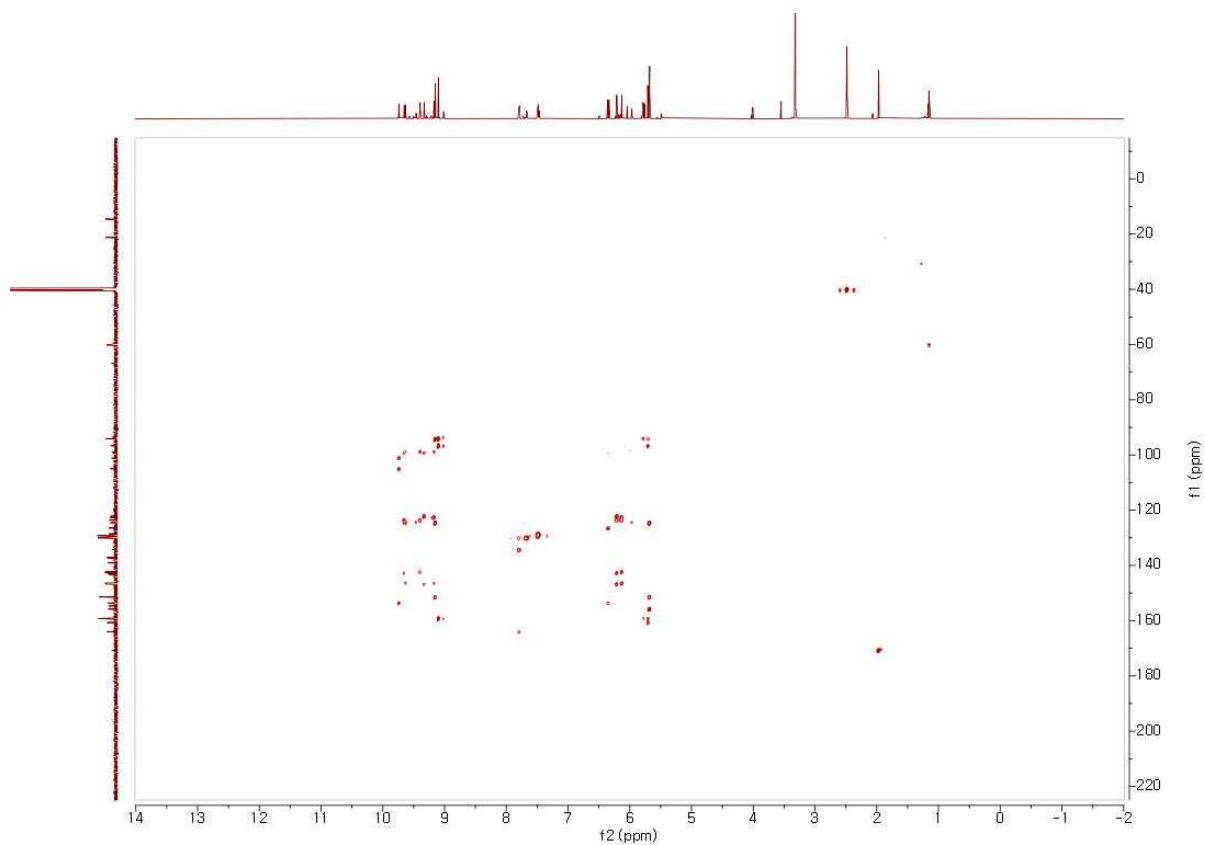

**Figure S10.** HMBC spectrum of **3** (600 MHz, DMSO- $d_6$ )

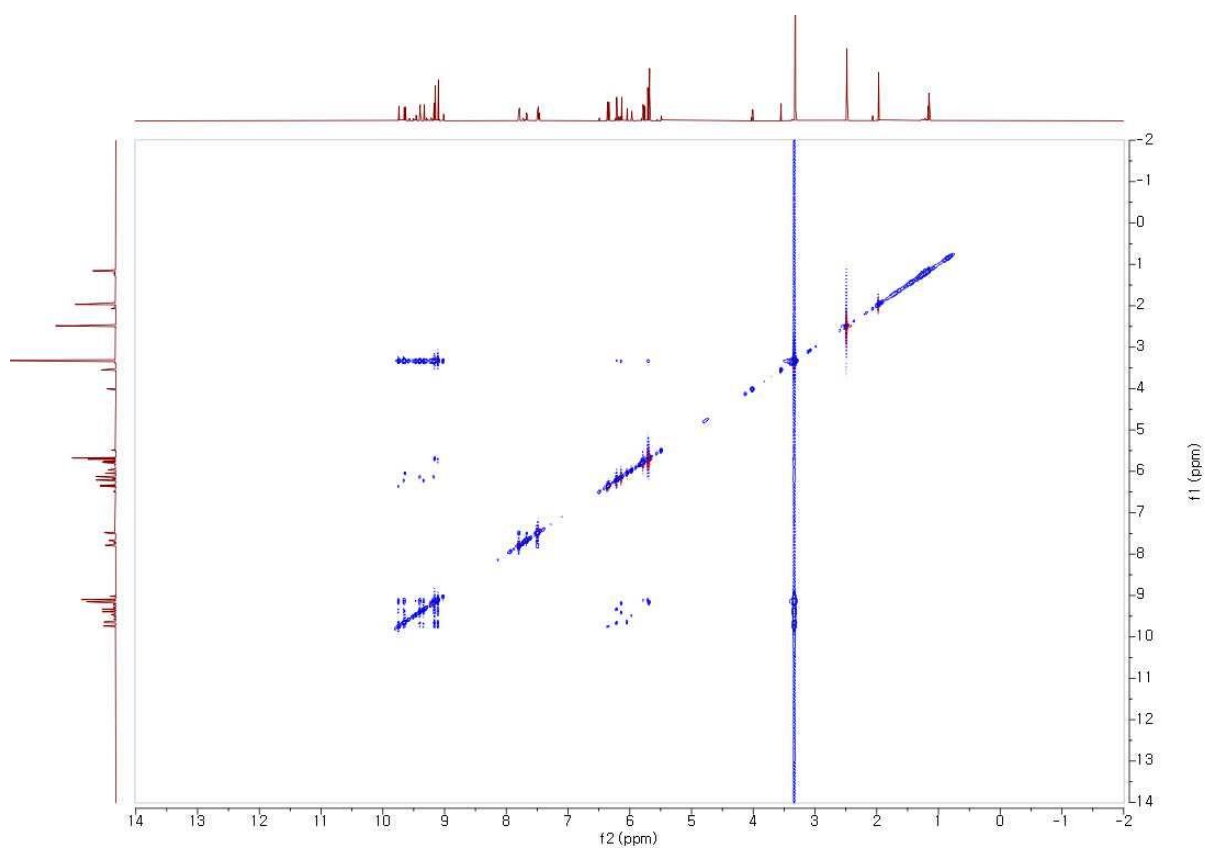

**Figure S11.** NOESY spectrum of **3** (600 MHz, DMSO- $d_6$ )

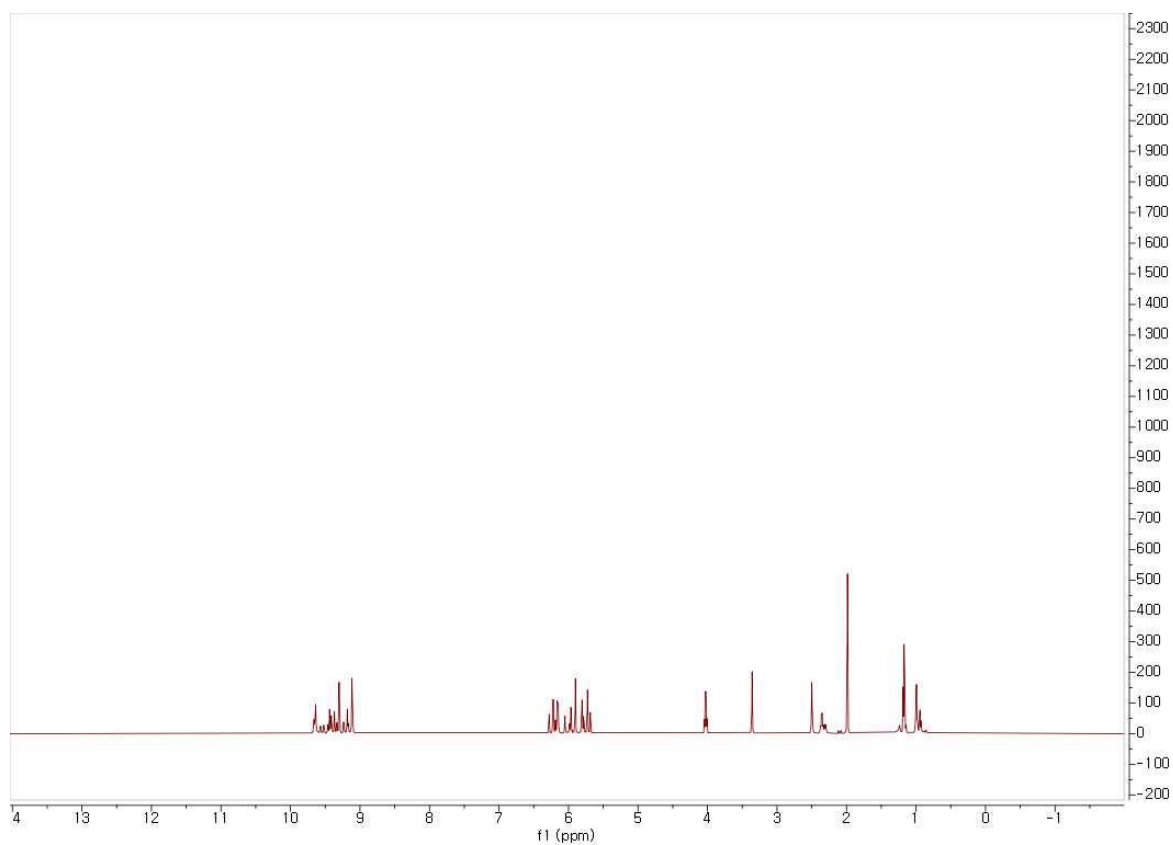

**Figure S12.** <sup>1</sup>H NMR spectrum of **4** (600 MHz, DMSO-*d*<sub>6</sub>)

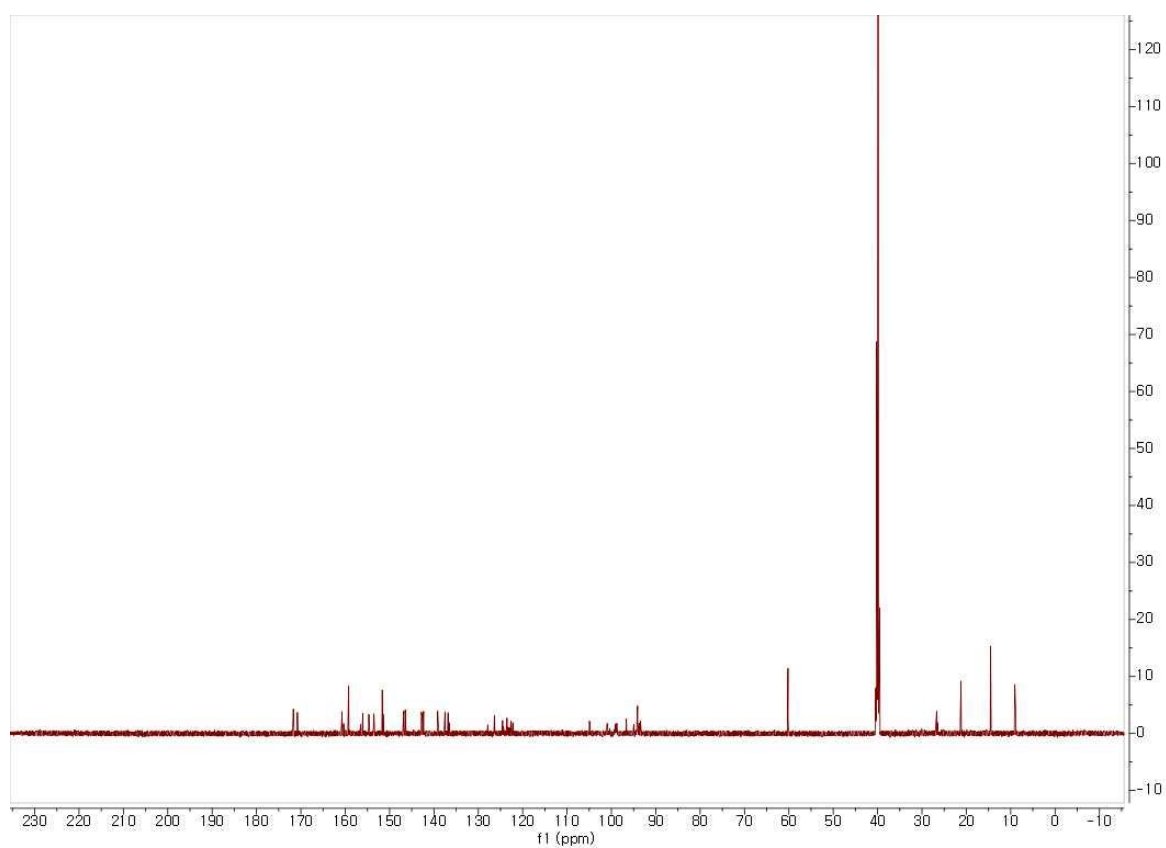

**Figure S13.** <sup>13</sup>C NMR spectrum of **4** (150 MHz, DMSO-*d*<sub>6</sub>)

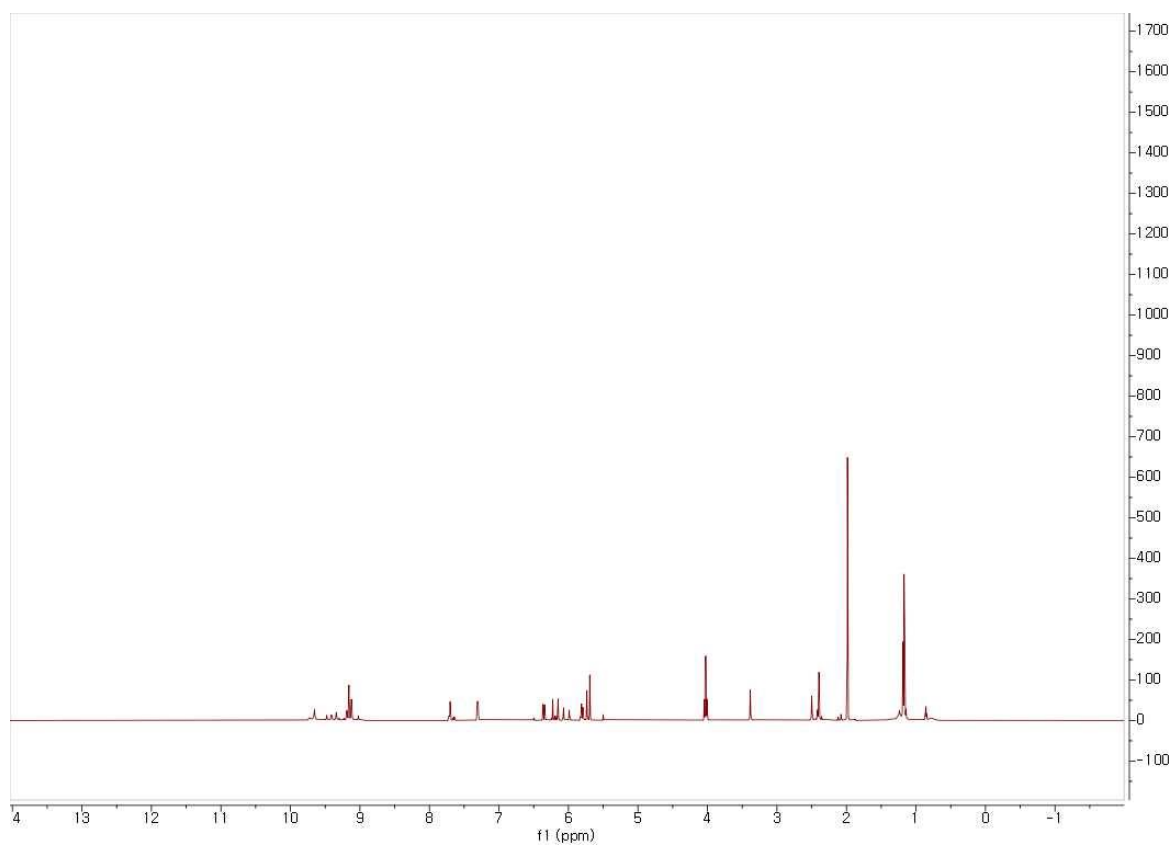

**Figure S14.**  $^1\text{H}$  NMR spectrum of **5** (600 MHz,  $\text{DMSO}-d_6$ )

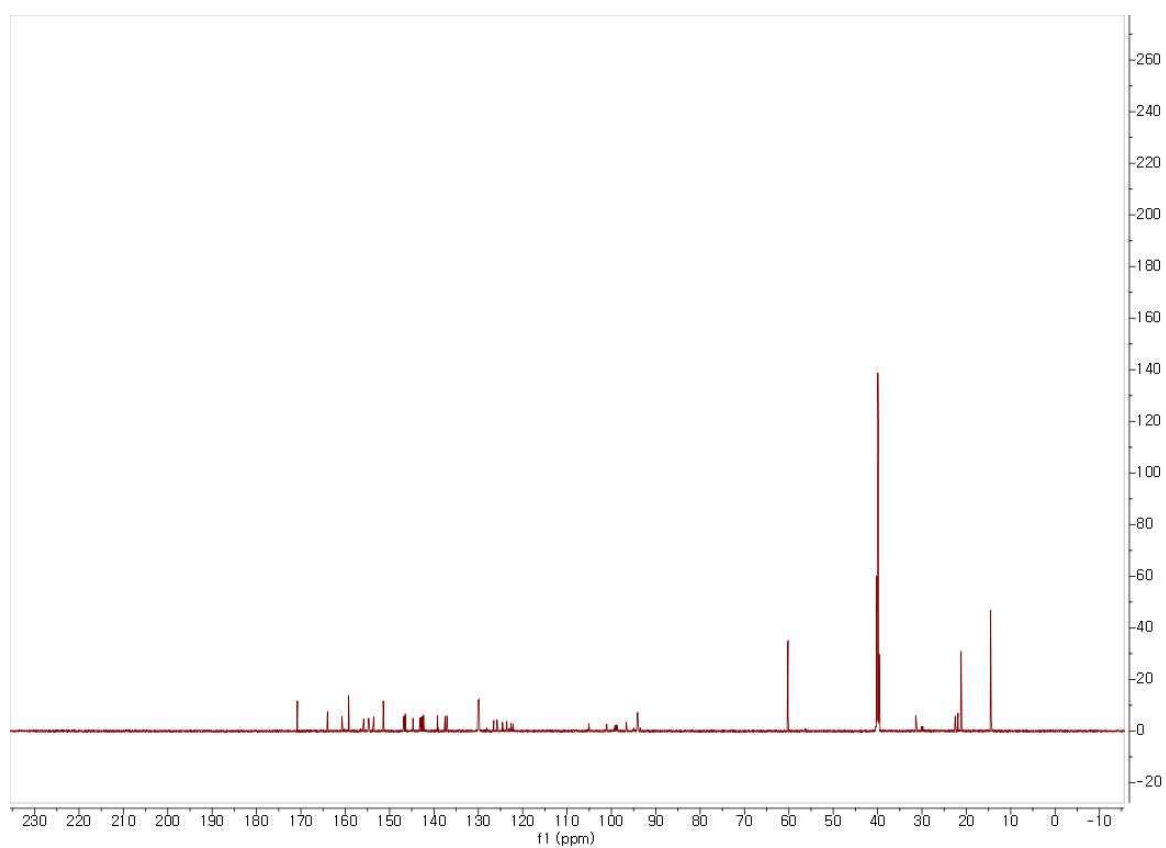

**Figure S15.**  $^{13}\text{C}$  NMR spectrum of **5** (150 MHz,  $\text{DMSO}-d_6$ )



**Table S1.**  $^1\text{H}$ ,  $^{13}\text{C}$ , HMBC, and NOESY NMR data of **3** ( $\delta$  in ppm, data obtained in DMSO- $d_6$ ).

| No.                                                 | $\delta_{\text{C}}$ | $\delta_{\text{H}}$ | (J in Hz)         | HMBC (H $\rightarrow$ C)                                                                                              | NOESY                                                   |
|-----------------------------------------------------|---------------------|---------------------|-------------------|-----------------------------------------------------------------------------------------------------------------------|---------------------------------------------------------|
| <b>1</b>                                            | 142.65              | 9.67                |                   | C <sub>2</sub> , C <sub>1</sub> , C <sub>10a</sub>                                                                    | C <sub>2</sub> -H                                       |
| <b>2</b>                                            | 99.21               | 6.23                |                   | C <sub>4</sub> , C <sub>3</sub> , C <sub>1</sub> , C <sub>10a</sub>                                                   | C <sub>3</sub> -H, C <sub>1</sub> -H                    |
| <b>3</b>                                            | 146.76              | 9.34                |                   | C <sub>4</sub> , C <sub>3</sub> , C <sub>2</sub>                                                                      | C <sub>2</sub> -H                                       |
| <b>4</b>                                            | 122.14              |                     |                   |                                                                                                                       |                                                         |
| <b>4a</b>                                           | 137.05              |                     |                   |                                                                                                                       |                                                         |
| <b>5a</b>                                           | 126.47              |                     |                   |                                                                                                                       |                                                         |
| <b>6</b>                                            | 139.07              |                     |                   |                                                                                                                       |                                                         |
| <b>7</b>                                            | 105.03              | 6.38                | d ( 2.73 )        | C <sub>9</sub> , C <sub>8</sub> , C <sub>6</sub> , C <sub>5a</sub>                                                    | C <sub>8</sub> -H                                       |
| <b>8</b>                                            | 153.55              | 9.76                |                   | C <sub>9</sub> , C <sub>8</sub> , C <sub>7</sub>                                                                      | C <sub>9</sub> -H, C <sub>7</sub> -H                    |
| <b>9</b>                                            | 101.13              | 6.35                | d ( 2.73 )        | C <sub>9a</sub> , C <sub>8</sub> , C <sub>7</sub> , C <sub>5a</sub>                                                   | C <sub>8</sub> -H                                       |
| <b>9a</b>                                           | 143.16              |                     |                   |                                                                                                                       |                                                         |
| <b>10a</b>                                          | 123.52              |                     |                   |                                                                                                                       |                                                         |
| <b>1'</b>                                           | 155.79              |                     |                   |                                                                                                                       |                                                         |
| <b>2'</b>                                           | 94.20               | 5.70                |                   | C <sub>1'</sub> , C <sub>2'</sub> , C <sub>3'</sub> , C <sub>4'</sub> , C <sub>5'</sub> , C <sub>6'</sub>             | C <sub>3</sub> -H, C <sub>5</sub> -H                    |
| <b>3'</b>                                           | 151.41              | 9.17                |                   | C <sub>2'</sub> , C <sub>3'</sub> , C <sub>4'</sub> , C <sub>5'</sub> , C <sub>6'</sub>                               | C <sub>2</sub> -H, C <sub>6</sub> -H                    |
| <b>4'</b>                                           | 124.61              |                     |                   |                                                                                                                       |                                                         |
| <b>5'</b>                                           | 151.41              | 9.17                |                   | C <sub>2'</sub> , C <sub>3'</sub> , C <sub>4'</sub> , C <sub>5'</sub> , C <sub>6'</sub>                               | C <sub>2</sub> -H, C <sub>6</sub> -H                    |
| <b>6'</b>                                           | 94.20               | 5.70                |                   | C <sub>1'</sub> , C <sub>2'</sub> , C <sub>3'</sub> , C <sub>4'</sub> , C <sub>5'</sub> , C <sub>6'</sub>             | C <sub>3</sub> -H, C <sub>5</sub> -H                    |
| <b>1''</b>                                          | 93.83               | 5.78                | d ( 2.85 )        | C <sub>10a''</sub> , C <sub>2''</sub> , C <sub>3''</sub> , C <sub>4a''</sub>                                          |                                                         |
| <b>2''</b>                                          | 154.66              |                     |                   |                                                                                                                       |                                                         |
| <b>3''</b>                                          | 98.85               | 6.06                | d ( 2.86 )        | C <sub>1''</sub> , C <sub>2''</sub> , C <sub>4a''</sub>                                                               | C <sub>4</sub> -H                                       |
| <b>4''</b>                                          | 146.33              | 9.65                |                   | C <sub>3''</sub> , C <sub>4''</sub> , C <sub>4a''</sub>                                                               | C <sub>3</sub> -H                                       |
| <b>4a''</b>                                         | 124.50              |                     |                   |                                                                                                                       |                                                         |
| <b>5a''</b>                                         | 137.48              |                     |                   |                                                                                                                       |                                                         |
| <b>6''</b>                                          | 122.60              |                     |                   |                                                                                                                       |                                                         |
| <b>7''</b>                                          | 146.46              | 9.19                |                   | C <sub>6''</sub> , C <sub>7''</sub> , C <sub>8''</sub>                                                                | C <sub>8</sub> -H                                       |
| <b>8''</b>                                          | 98.73               | 6.15                |                   | C <sub>6''</sub> , C <sub>7''</sub> , C <sub>9''</sub> , C <sub>9a''</sub>                                            | C <sub>7</sub> -H, C <sub>9</sub> -H                    |
| <b>9''</b>                                          | 142.31              | 9.41                |                   | C <sub>8''</sub> , C <sub>9''</sub> , C <sub>9a''</sub>                                                               | C <sub>8</sub> -H                                       |
| <b>9a''</b>                                         | 123.58              |                     |                   |                                                                                                                       |                                                         |
| <b>10a''</b>                                        | 142.80              |                     |                   |                                                                                                                       |                                                         |
| <b>1'''</b>                                         | 160.70              |                     |                   |                                                                                                                       |                                                         |
| <b>2'''</b>                                         | 94.07               | 5.73                | d ( 2.09 )        | C <sub>1'''</sub> , C <sub>2'''</sub> , C <sub>3'''</sub> , C <sub>4'''</sub> , C <sub>5'''</sub> , C <sub>6'''</sub> | C <sub>3</sub> -H, C <sub>5</sub> -H                    |
| <b>3'''</b>                                         | 159.20              | 9.12                |                   | C <sub>2'''</sub> , C <sub>3'''</sub> , C <sub>4'''</sub> , C <sub>5'''</sub> , C <sub>6'''</sub>                     | C <sub>2</sub> -H, C <sub>4</sub> -H, C <sub>6</sub> -H |
| <b>4'''</b>                                         | 96.62               | 5.80                | t ( 2.08 )        | C <sub>2'''</sub> , C <sub>3'''</sub> , C <sub>5'''</sub> , C <sub>6'''</sub>                                         | C <sub>3</sub> -H                                       |
| <b>5'''</b>                                         | 159.20              | 9.12                |                   | C <sub>2'''</sub> , C <sub>3'''</sub> , C <sub>4'''</sub> , C <sub>5'''</sub> , C <sub>6'''</sub>                     | C <sub>2</sub> -H, C <sub>4</sub> -H, C <sub>6</sub> -H |
| <b>6'''</b>                                         | 94.07               | 5.73                | d ( 2.09 )        | C <sub>1'''</sub> , C <sub>2'''</sub> , C <sub>3'''</sub> , C <sub>4'''</sub> , C <sub>5'''</sub> , C <sub>6'''</sub> | C <sub>3</sub> -H, C <sub>5</sub> -H                    |
| <b>6-O(CO)C(CH)<sub>2</sub>(CH)<sub>2</sub>(CH)</b> | 164.01              |                     |                   |                                                                                                                       |                                                         |
| <b>6-O(CO)C(CH)<sub>2</sub>(CH)<sub>2</sub>(CH)</b> | 134.31              |                     |                   |                                                                                                                       |                                                         |
| <b>6-O(CO)C(CH)<sub>2</sub>(CH)<sub>2</sub>(CH)</b> | 130.02              | 7.81                | dd ( 7.04, 1.32 ) | C <sub>6</sub> -O(CO)C(CH) <sub>2</sub> (CH) <sub>2</sub> (CH),                                                       | C <sub>2</sub> -H, C <sub>6</sub> -H                    |
| <b>6-O(CO)C(CH)<sub>2</sub>(CH)<sub>2</sub>(CH)</b> | 129.19              | 7.50                | t ( 7.47 )        | C <sub>6</sub> -O(CO)C(CH) <sub>2</sub> (CH) <sub>2</sub> (CH)                                                        |                                                         |
| <b>6-O(CO)C(CH)<sub>2</sub>(CH)<sub>2</sub>(CH)</b> | 128.54              | 7.69                | tt ( 7.47, 1.32 ) | C <sub>6</sub> -O(CO)C(CH) <sub>2</sub> (CH) <sub>2</sub> (CH)                                                        |                                                         |

**Table S2.** <sup>1</sup>H and <sup>13</sup>C NMR data of **4** ( $\delta$  in ppm, data obtained in DMSO-*d*<sub>6</sub>).

| No.                                        | $\delta_c$ | $\delta_H$ | ( <i>J</i> in Hz) |
|--------------------------------------------|------------|------------|-------------------|
| <b>1</b>                                   | 142.64     | 9.65       |                   |
| <b>2</b>                                   | 99.10      | 6.22       |                   |
| <b>3</b>                                   | 146.80     | 9.37       |                   |
| <b>4</b>                                   | 122.23     |            |                   |
| <b>4a</b>                                  | 136.81     |            |                   |
| <b>5a</b>                                  | 126.37     |            |                   |
| <b>6</b>                                   | 139.16     |            |                   |
| <b>7</b>                                   | 104.95     | 6.16       | d ( 2.71 )        |
| <b>8</b>                                   | 153.53     | 9.66       |                   |
| <b>9</b>                                   | 100.96     | 6.28       | d ( 2.71 )        |
| <b>9a</b>                                  | 143.00     |            |                   |
| <b>10a</b>                                 | 123.53     |            |                   |
| <b>1'</b>                                  | 156.04     |            |                   |
| <b>2'</b>                                  | 94.22      | 5.90       |                   |
| <b>3'</b>                                  | 151.65     | 9.30       |                   |
| <b>4'</b>                                  | 124.62     |            |                   |
| <b>5'</b>                                  | 151.65     | 9.30       |                   |
| <b>6'</b>                                  | 94.22      | 5.90       |                   |
| <b>1''</b>                                 | 93.73      | 5.81       | d ( 2.87 )        |
| <b>2''</b>                                 | 154.67     |            |                   |
| <b>3''</b>                                 | 98.83      | 6.05       | d ( 2.87 )        |
| <b>4''</b>                                 | 146.34     | 9.64       |                   |
| <b>4a''</b>                                | 124.52     |            |                   |
| <b>5a''</b>                                | 137.52     |            |                   |
| <b>6''</b>                                 | 122.63     |            |                   |
| <b>7''</b>                                 | 146.47     | 9.18       |                   |
| <b>8''</b>                                 | 98.74      | 6.15       |                   |
| <b>9''</b>                                 | 142.33     | 9.44       |                   |
| <b>9a''</b>                                | 123.60     |            |                   |
| <b>10a''</b>                               | 142.84     |            |                   |
| <b>1'''</b>                                | 160.72     |            |                   |
| <b>2'''</b>                                | 94.09      | 5.73       | d ( 2.11 )        |
| <b>3'''</b>                                | 159.21     | 9.12       |                   |
| <b>4'''</b>                                | 96.63      | 5.80       | t ( 2.11 )        |
| <b>5'''</b>                                | 159.21     | 9.12       |                   |
| <b>6'''</b>                                | 94.09      | 5.73       | d ( 2.11 )        |
| <b>6-O(CO)CH<sub>2</sub>CH<sub>3</sub></b> | 171.25     |            |                   |
| <b>6-O(CO)CH<sub>2</sub>CH<sub>3</sub></b> | 26.67      | 2.36       | q ( 7.48 )        |
| <b>6-O(CO)CH<sub>2</sub>CH<sub>3</sub></b> | 9.07       | 0.99       | t ( 7.48 )        |

**Table S3.** <sup>1</sup>H and <sup>13</sup>C NMR data of **5** (δ in ppm, data obtained in DMSO-*d*<sub>6</sub>).

| No.                                                          | δ <sub>C</sub> | δ <sub>H</sub> | ( <i>J</i> in Hz) |
|--------------------------------------------------------------|----------------|----------------|-------------------|
| 1                                                            | 142.66         | 9.65           |                   |
| 2                                                            | 99.19          | 6.23           |                   |
| 3                                                            | 146.78         | 9.34           |                   |
| 4                                                            | 122.17         |                |                   |
| 4a                                                           | 137.07         |                |                   |
| 5a                                                           | 126.51         |                |                   |
| 6                                                            | 139.19         |                |                   |
| 7                                                            | 105.07         | 6.37           | d ( 2.74 )        |
| 8                                                            | 153.53         | 9.73           |                   |
| 9                                                            | 101.04         | 6.34           | d ( 2.74 )        |
| 9a                                                           | 143.17         |                |                   |
| 10a                                                          | 123.58         |                |                   |
| 1'                                                           | 155.81         |                |                   |
| 2'                                                           | 94.21          | 5.69           |                   |
| 3'                                                           | 151.43         | 9.16           |                   |
| 4'                                                           | 124.68         |                |                   |
| 5'                                                           | 151.43         | 9.16           |                   |
| 6'                                                           | 94.21          | 5.69           |                   |
| 1''                                                          | 93.93          | 5.79           | d ( 2.88 )        |
| 2''                                                          | 154.70         |                |                   |
| 3''                                                          | 98.92          | 6.07           | d ( 2.88 )        |
| 4''                                                          | 146.34         | 9.65           |                   |
| 4a''                                                         | 124.54         |                |                   |
| 5a''                                                         | 137.51         |                |                   |
| 6''                                                          | 122.64         |                |                   |
| 7''                                                          | 146.48         | 9.19           |                   |
| 8''                                                          | 98.75          | 6.15           |                   |
| 9''                                                          | 142.34         | 9.41           |                   |
| 9a''                                                         | 123.62         |                |                   |
| 10a''                                                        | 142.82         |                |                   |
| 1'''                                                         | 160.73         |                |                   |
| 2'''                                                         | 94.10          | 5.73           | d ( 2.10 )        |
| 3'''                                                         | 159.23         | 9.12           |                   |
| 4'''                                                         | 96.65          | 5.81           | t ( 2.10 )        |
| 5'''                                                         | 159.23         | 9.12           |                   |
| 6'''                                                         | 94.10          | 5.73           | d ( 2.10 )        |
| 6-O(CO)C(CH) <sub>2</sub> (CH) <sub>2</sub> CCH <sub>3</sub> | 163.99         |                |                   |
| 6-O(CO)C(CH) <sub>2</sub> (CH) <sub>2</sub> CCH <sub>3</sub> | 125.79         |                |                   |
| 6-O(CO)C(CH) <sub>2</sub> (CH) <sub>2</sub> CCH <sub>3</sub> | 130.08         | 7.71           | d ( 8.05 )        |
| 6-O(CO)C(CH) <sub>2</sub> (CH) <sub>2</sub> CCH <sub>3</sub> | 129.84         | 7.31           | d ( 8.05 )        |
| 6-O(CO)C(CH) <sub>2</sub> (CH) <sub>2</sub> CCH <sub>3</sub> | 144.75         |                |                   |
| 6-O(CO)C(CH) <sub>2</sub> (CH) <sub>2</sub> CCH <sub>3</sub> | 21.87          | 2.40           |                   |
